# Supplementary material for: Cationic Polymer Nanoparticles-Mediated Delivery of miR-124 Impairs Tumorigenicity of Prostate Cancer Cells
Source: PubMed Central journal article supplement (PMC7038067; doi:10.3390/ijms21030869), 2020-01-29
Supplement: ijms-21-00869-s001.pdf [file ijms-21-00869-s001.pdf]

## Supporting Information

# Cationic polymer nanoparticles mediated delivery of miR-124 impairs tumorigenicity of prostate cancer cells

*Raffaele Conte,<sup>a,‡</sup> Anna Valentino,<sup>b,‡</sup> Ilenia De Luca,<sup>b</sup> Gianfranco Peluso,<sup>a</sup> Pierfrancesco Cerruti,<sup>c,\*</sup> Anna Di Salle,<sup>a</sup> Anna Calarco<sup>a,\*</sup>*

<sup>a</sup>Research Institute on Terrestrial Ecosystems (IRET-CNR), Via P. Castellino 111 80131 Napoli, Italy

<sup>b</sup>Elleva Pharma Srl, Via P. Castellino 111 80131 Napoli, Italy

<sup>c</sup>Institute for Polymers, Composites and Biomaterials (IPCB-CNR), Via Campi Flegrei 34 80078 Pozzuoli (Na), Italy

Correspondence to: Pierfrancesco Cerruti. email: [cerruti@ipcb.cnr.it](mailto:cerruti@ipcb.cnr.it); Anna Calarco. email: [anna.calarco@cnr.it](mailto:anna.calarco@cnr.it)

## Contents

|                                                                                                                                                                                                                                                  |    |
|--------------------------------------------------------------------------------------------------------------------------------------------------------------------------------------------------------------------------------------------------|----|
| <b>Table S1.</b> Size of PHB NPs (nm) as a function of PHB and Pluronic® F-127 concentration.....                                                                                                                                                | S3 |
| <b>Table S2.</b> Concentration (mmol -NH <sub>2</sub> /g) of -NH <sub>2</sub> groups on the PHB-PEI NPs surface.....                                                                                                                             | S4 |
| <b>Figure S1.</b> Evaluation of cytotoxicity in Caco-2, MCF-7 and MCF10A cells after 6, 24, 48 and 72 hours of incubation with PHB-PEI NPs .....                                                                                                 | S5 |
| <b>Figure S2.</b> Degradation assay of free miRNA or miR-124 NPs at N/P ratio of 1:1, 5:1, and 10:1 treated with RNase A for 60 minutes. Released nucleotides was measured by spectrophotometric continuous detection ( $\lambda = 260$ nm)..... | S6 |

**Table S1.** Size of PHB NPs (nm) as a function of PHB and Pluronic® F-127 concentration.

| PHB concentration<br>(mg/ml) | Pluronic® F-127 concentration (wt%) |              |              |              |
|------------------------------|-------------------------------------|--------------|--------------|--------------|
|                              | 0.1                                 | 0.5          | 1            | 2            |
| 8.33                         | 298.9 ± 48.8                        | 153.3 ± 44.1 | 191.7 ± 49.7 | 138.3 ± 44.9 |
| 16.7                         | 455.4 ± 95.7                        | 254.5 ± 43.2 | 231.4 ± 55.0 | 167.7 ± 44.1 |
| 33.3                         | 644.6 ± 115.8                       | 425.2 ± 87.9 | 381.0 ± 65.0 | 305.4 ± 59.1 |
| 41.7                         | 705.5 ± 235.8                       | 554.4 ± 97.7 | 502.5 ± 85.4 | 450.3 ± 73.5 |

**Table S2.** Concentration (mmol -NH<sub>2</sub>/g) of -NH<sub>2</sub> groups on the PHB-PEI NPs surface.

| PEI concentration<br>(% w/v) | Reaction conditions |                    |                    |                    |                   |                    |                    |                    |                    |                     |                     |                     |
|------------------------------|---------------------|--------------------|--------------------|--------------------|-------------------|--------------------|--------------------|--------------------|--------------------|---------------------|---------------------|---------------------|
|                              | 5 min at<br>25 °C   | 15 min at<br>25 °C | 30 min at<br>25 °C | 60 min at<br>25 °C | 5 min at<br>50 °C | 15 min at<br>50 °C | 30 min<br>at 50 °C | 60 min<br>at 50 °C | 5 min at<br>100 °C | 15 min at<br>100 °C | 30 min at<br>100 °C | 60 min at<br>100 °C |
| 12                           | 12.3                | 15.4               | 14.4               | 13.4               | 33.1              | 32.2               | 34.3               | 36.4               | 29.3               | 30.3                | 30.4                | 31.2                |
| 24                           | 13.3                | 16.4               | 14.4               | 15.2               | 31.3              | 38.2               | 36.4               | 35.3               | 34.2               | 34.1                | 32.4                | 33.3                |
| 48                           | 11.2                | 14.1               | 11.4               | 10.2               | 35.1              | 33.2               | 34.3               | 33.3               | 33.4               | 31.2                | 29.1                | 26.3                |

**Figure S1**

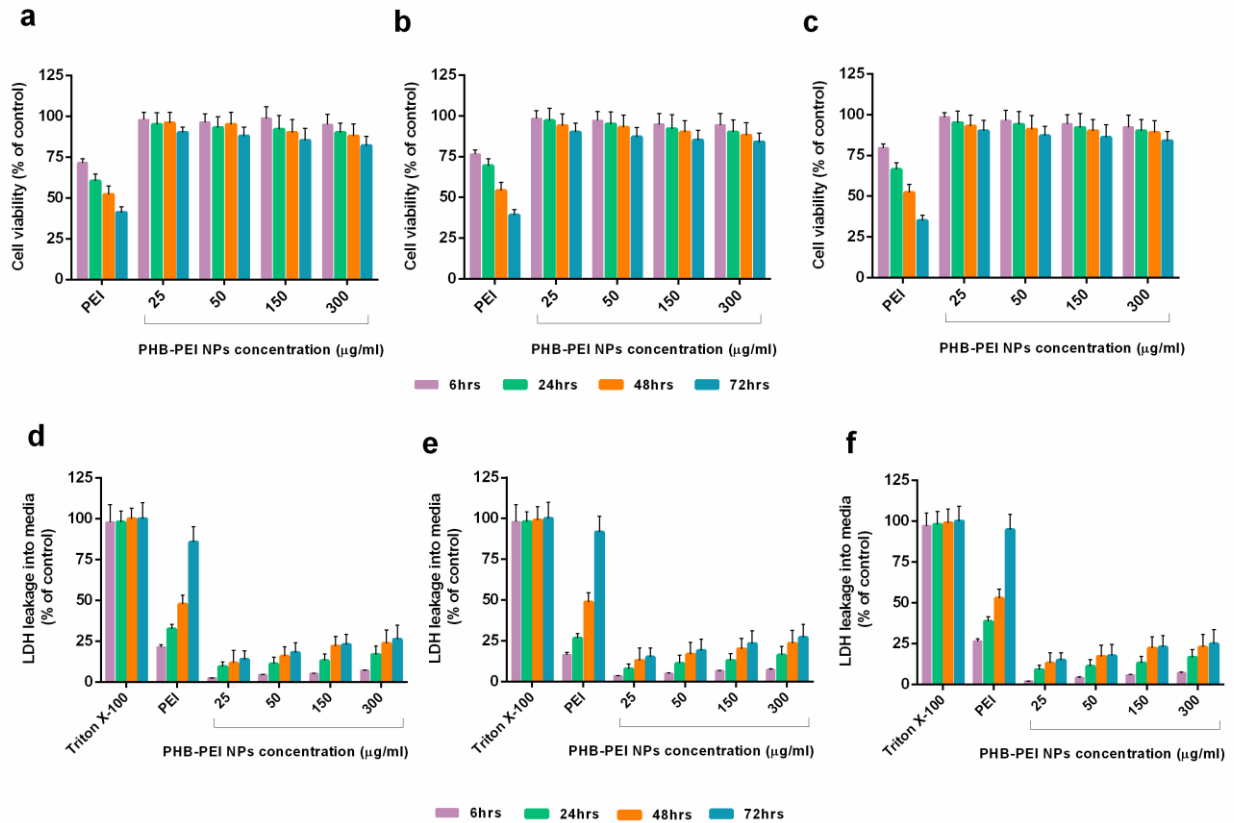

**Figure S1.** Cytotoxicity was determined in Caco-2, MCF-7 and MCF10A cells after 6, 24, 48 and 72 hours of incubation with varying concentrations of PHB-PEI NPs using the CCK-8 assay: (a, b and c; Caco-2, MCF-7 and MCF10A respectively), and the LDH assay (d, e and f; Caco-2, MCF-7 and MCF10A respectively). Untreated cells were used as control. Data represent the mean±SD for three independent measurements.

**Figure S2**

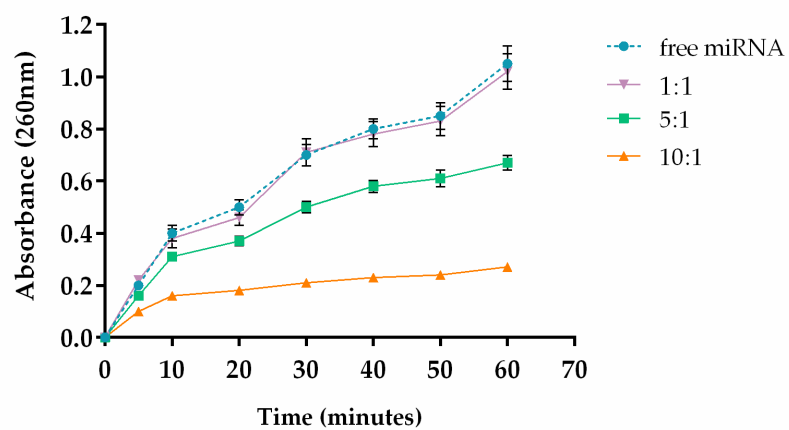

**Figure S2.** Degradation assay of free miRNA or miR-124 NPs at N/P ratio of 1:1, 5:1, and 10:1 treated with RNase A for 60 minutes. Released nucleotides were measured by UV spectrophotometric continuous detection ( $\lambda = 260$  nm).
